# Supplementary material for: Homogeneous dielectric elastomers with dramatically improved actuated strain by grafting dipoles onto SBS using thiol–ene click chemistry
Source: Royal Society of Chemistry journal article supplement (doi:10.1039/c6py00581k), 2016-01-01
Supplement: c6py00581k1.pdf [file c6py00581k1.pdf]

## **Supporting Information for**

### **Homogeneous Dielectric Elastomers with Dramatically Improved Actuated Strain by Grafting Dipoles onto SBS Using Thiol-ene Click Chemistry**

Haibin Sun<sup>a</sup>, Chunyu Jiang<sup>a</sup>, Nanying Ning<sup>a,b,\*</sup>, Liquan Zhang<sup>a,b</sup>, Ming Tian<sup>a,b,\*</sup> and Shengli  
Yuan<sup>c</sup>

<sup>a</sup>Key Laboratory of Beijing City on Preparation and Processing of Novel Polymer Materials, Beijing  
University of Chemical Technology, Beijing 100029, China;

<sup>b</sup>Key Laboratory of Carbon Fiber and Functional Polymers, Ministry of Education, Beijing University of  
Chemical Technology, Beijing 100029, China;

<sup>c</sup>Cheng Du Gui Bao Science & Technology Co., Ltd, Chengdu 610041, China.

\* Corresponding authors. E-mail addresses: tianm@mail.buct.edu.cn (M. Tian);  
ningny@mail.buct.edu.cn (N. Ning)

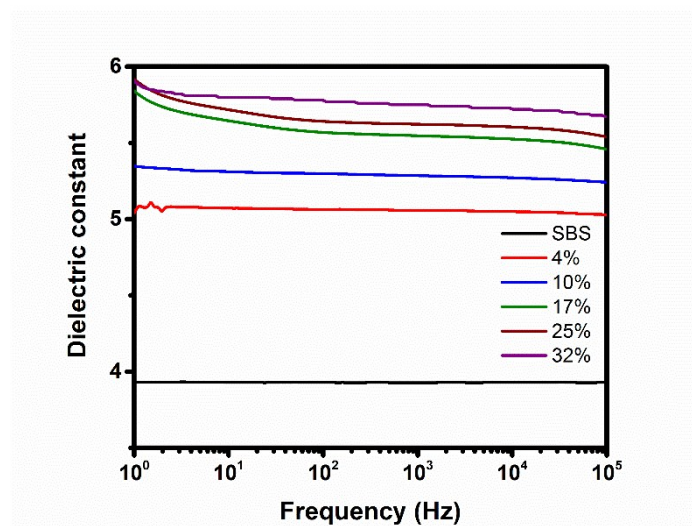

Fig. S1 Dielectric constant of modified SBS with low grafting degrees

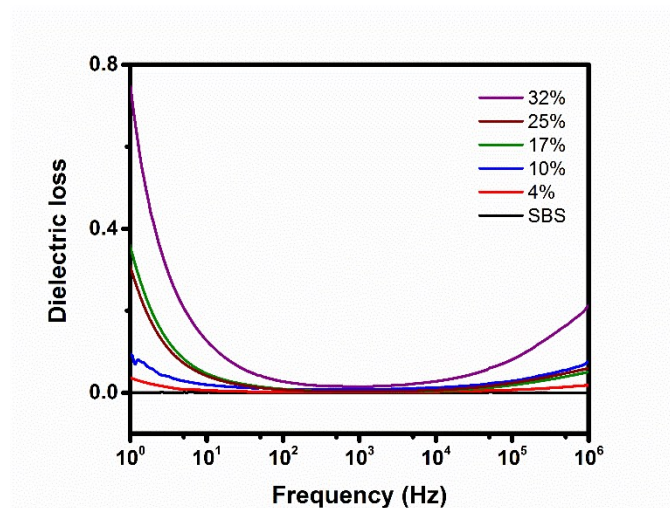

Fig. S2 Dielectric loss of modified SBS with low grafting degrees

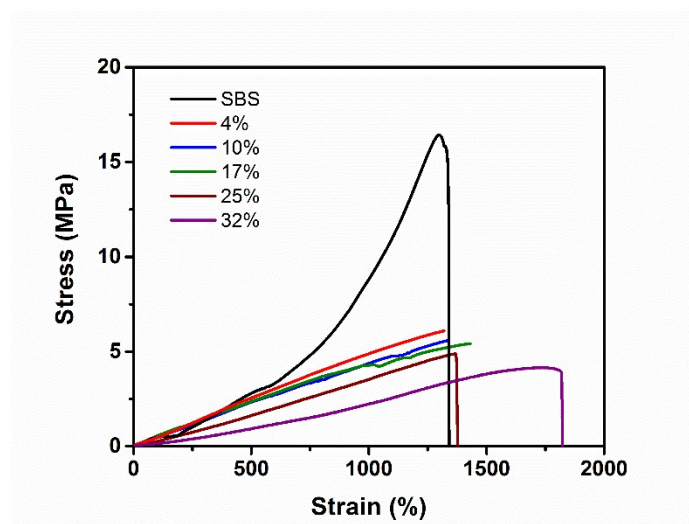

Fig. S3 Stress-strain curves of modified SBS with low grafting degrees
